# Supplementary material
Source: PubMed Central journal article supplement (PMC3427258)
Supplement: auto-8-927-s01.pdf [file auto-8-927-s01.pdf]

**Supplemental Material to:**

**Isabelle Sirois, Jessika Groleau, Nicolas Pallet, Nathalie Brassard, Katia Hamelin, Irène Londono, Alexey Pshezhetsky, Moise Bendayan and Marie-Josée Hébert**  
**Caspase activation regulates the extracellular export of autophagic vacuoles**

**Autophagy 2012; 8(6); <http://dx.doi.org/10.4161/auto.19768>**

**[www.landesbioscience.com/journals/autophagy/article/19768](http://www.landesbioscience.com/journals/autophagy/article/19768)**

### Supplementary Material Figure S1

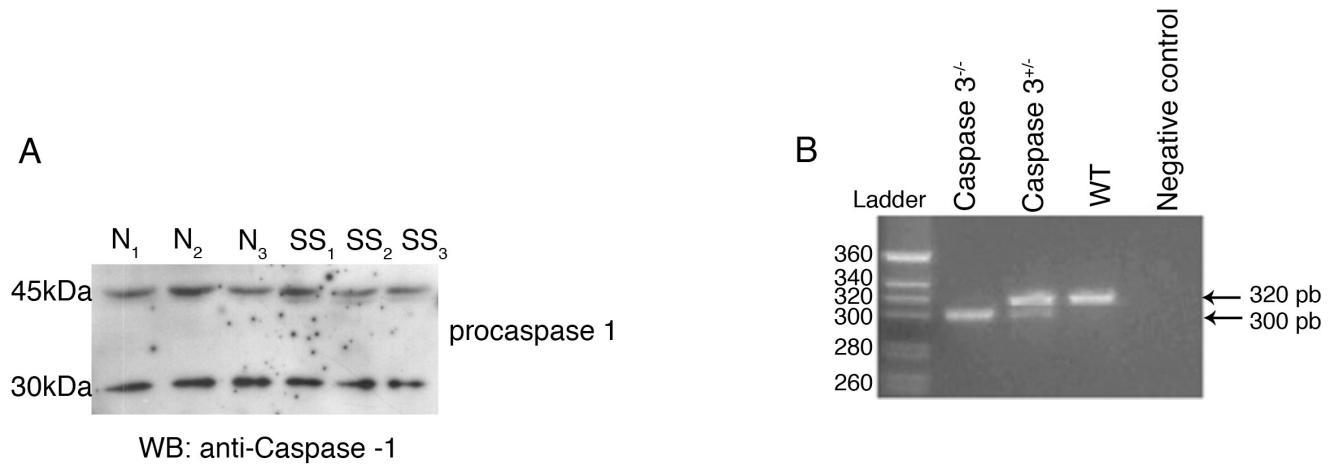

Supplementary Figure S1. (A) Representative western blots of pro-caspase-1 in human endothelial cells exposed to normal medium (N) or serum starved for 4 hours (SS) (n=3 different experiments). (B) Genotyping of Caspase 3<sup>-/-</sup>, Caspase 3<sup>+/-</sup> and wild type (WT) mice was performed by PCR.

### Supplementary Table S1

| Gene name  | Accession # | Peptide sequence              | % protein coverage | spi (%) | score | Parent charge | Parent M/Z | Matched parent mass | Delta parent mass | Spectra intensity |
|------------|-------------|-------------------------------|--------------------|---------|-------|---------------|------------|---------------------|-------------------|-------------------|
| MAP1LC3B   | Q49A36      | (R)HLSTQQYRGTLFANQPK(M)       | 5.7                | 79.4    | 9.8   | 3.0           | 663.8      | 1989.031            | 0.354             | 1.2E+07           |
| ATG4D      | Q86TL0      | (R)DWRWVEGTGLASSEMPGPASPSR(C) | 8.0                | 87.0    | 8.1   | 3.0           | 824.81     | 2473.157            | -0.743            | 1.2E+07           |
| ATG16L1    | Q175G0      | (K)QHSSSINAVAWAPSGLHVVSVDK(G) | 4.0                | 82.3    | 6.1   | 3.0           | 796.62     | 2389.226            | -1.382            | 1.4E+07           |
| VPS4B/SKD1 | O75351      | (K)EGQPSPADEK(G)              | 12.1               | 54.3    | 6.4   | 2.0           | 528.35     | 1057.48             | -1.788            | 1.7E+07           |
| VPS16      | A1A4H0      | (K)DVSEDEVAR(A)               | 1.3                | 90.4    | 7.9   | 2.0           | 503.42     | 1005.449            | 0.383             | 1.7E+08           |
| Lamp2      | P13473      | (K)VTYNGSSCGDDKNGAK(I)        | 3.4                | 83.4    | 9.0   | 2.0           | 837.13     | 1672.724            | 0.528             | 2.8E+07           |
| RAB7A      | P51149      | (R)DDVLAKIIPMEQSYPMVVLGNK(I)  | 10.6               | 91.0    | 6.3   | 3.0           | 820.06     | 2460.288            | -2.124            | 1.3E+07           |

Supplementary Table S1. Primary data of autophagy-related proteins presented in Table 1. Gene names and primary accession numbers were obtained from <http://ca.expasy.org/sprot/>. MS/MS parameters were generated from Spectrum Mill Software (Agilent Technologies).
